# Supplementary material for: Anosmia Testing as Early Detection of SARS-CoV-2 Positivity; A Prospective Study under Screening Conditions
Source: MDPI journal article supplement (doi:10.3390/life12070968), 2022-06-28
Supplement: s1 [file s1]

inside

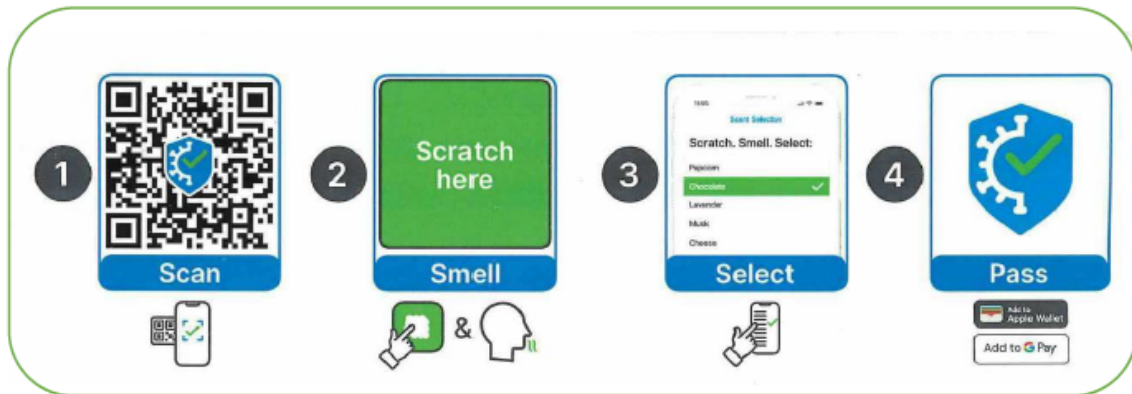

outside

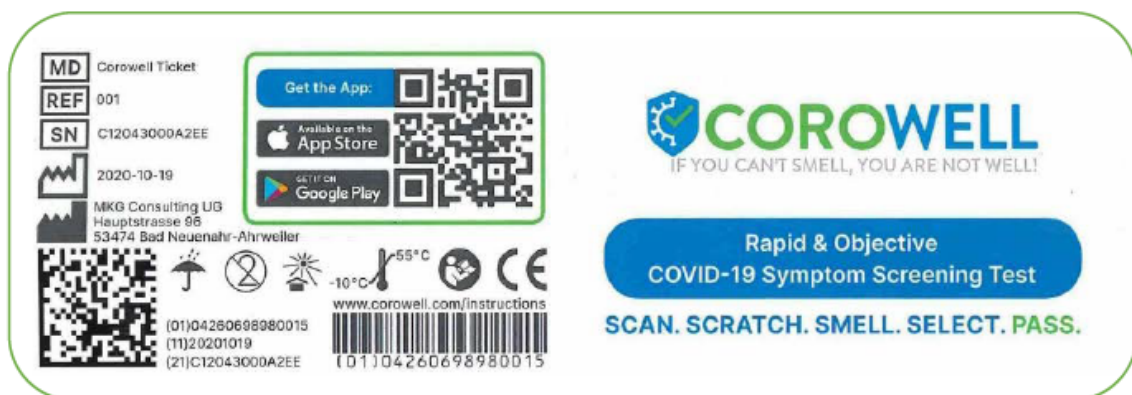

**Supplemental Material S1:** Scan of the commercially available scratch test used in the study.

|                                                                          |                                     |
|--------------------------------------------------------------------------|-------------------------------------|
| gender                                                                   | female; male; undefined             |
| age                                                                      | years                               |
| Already longer olfactory problems ?                                      | No; yes (daily); yes (occasionally) |
| smoked during the last 2 hours                                           | yes/ no                             |
| how do you value your scent ability in general?                          | five-level Likert item              |
| Cold/ hay fever                                                          | yes/ no                             |
| How do you rate your ability breathing through your nose?                | five-level Likert item              |
| positive molecular genetic SARS-CoV-2 detection during the last 2 months | yes/ no                             |

**Supplemental Material S2:** Overview of the questionnaire and the possible answers and their scales.

# Variable Tree

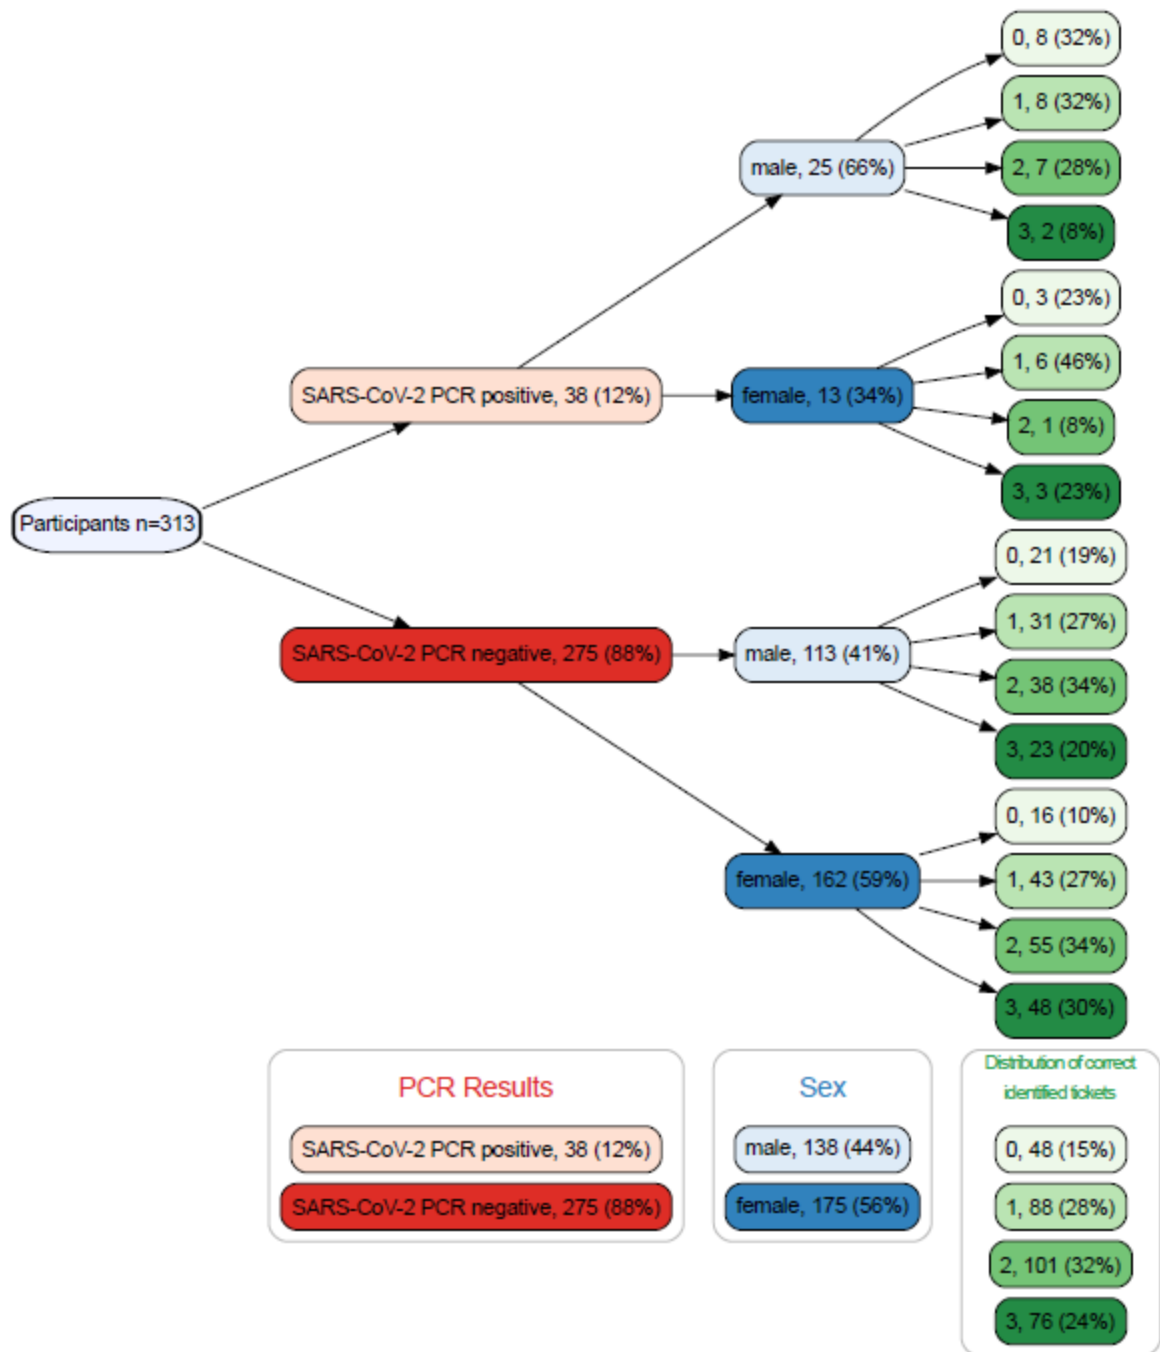

**Supplemental Material S3:** Distribution tree of test results in total number and percentages.

| PCRRes                                                    | NEGATIVE    | POSITIVE    |          |
|-----------------------------------------------------------|-------------|-------------|----------|
| n=                                                        | 275         | 38          |          |
| <b><u>Sex</u></b>                                         |             |             |          |
| male                                                      | 113 (41.1%) | 25 (65.8%)  |          |
| female                                                    | 162 (58.9%) | 13 (34.2%)  | p=0.005  |
| <b><u>Age</u></b>                                         |             |             |          |
| Mean (SD)                                                 | 31.8 (14.4) | 32.9 (13.3) |          |
| Range                                                     | 8.0 - 77.0  | 9.0 - 63.0  |          |
| <b><u>hay fever/ cold</u></b>                             |             |             |          |
| No                                                        | 200 (72.7%) | 23 (60.5%)  |          |
| Yes                                                       | 75 (27.3%)  | 15 (39.5%)  | p=0.1287 |
| <b><u>smoked last 2 hours</u></b>                         |             |             |          |
| No                                                        | 236 (85.8%) | 32 (84.2%)  |          |
| Yes                                                       | 39 (14.2%)  | 15 (39.5%)  | p=0.8055 |
| <b><u>scent problems since longer time</u></b>            |             |             |          |
| No                                                        | 218 (79.3%) | 29 (76.3%)  |          |
| Yes (daily)                                               | 45 (16.4%)  | 7 (18.4%)   |          |
| Yes (occasionally)                                        | 12 (4.4%)   | 2 (5.3%)    | p=0.6736 |
| <b><u>scent ability</u></b>                               |             |             |          |
| very good                                                 | 60 (21.8%)  | 9 (23.7%)   |          |
| good                                                      | 128 (46.5%) | 15 (39.5%)  |          |
| normal/ average                                           | 72 (26.2%)  | 10 (26.3%)  |          |
| bad                                                       | 13 (4.7%)   | 3 (7.9%)    |          |
| very bad                                                  | 1 (0.4%)    | 1 (2.6%)    |          |
| not specified                                             | 1 (0.4%)    |             | p=0.3465 |
| <b><u>ability to inspire through nose</u></b>             |             |             |          |
| very good                                                 | 30 (10.9%)  | 6 (15.8%)   |          |
| good                                                      | 175 (63.6%) | 19 (50.0%)  |          |
| normal/ average                                           | 27 (9.8%)   | 7 (18.4%)   |          |
| bad                                                       | 39 (14.2%)  | 6 (15.8%)   |          |
| very bad                                                  | 4 (1.5%)    |             | p=0.245  |
| <b><u>tested positive for SARS-CoV-2 last 2 month</u></b> |             |             |          |
| No                                                        | 248 (90.2%) | 24 (63.2%)  |          |
| Yes                                                       | 27 (9.8%)   | 14 (36.8%)  | p<0.001  |

**Supplemental Material S4:** Descriptive table Life 2022, 12, 0 14 of 16 of variables.

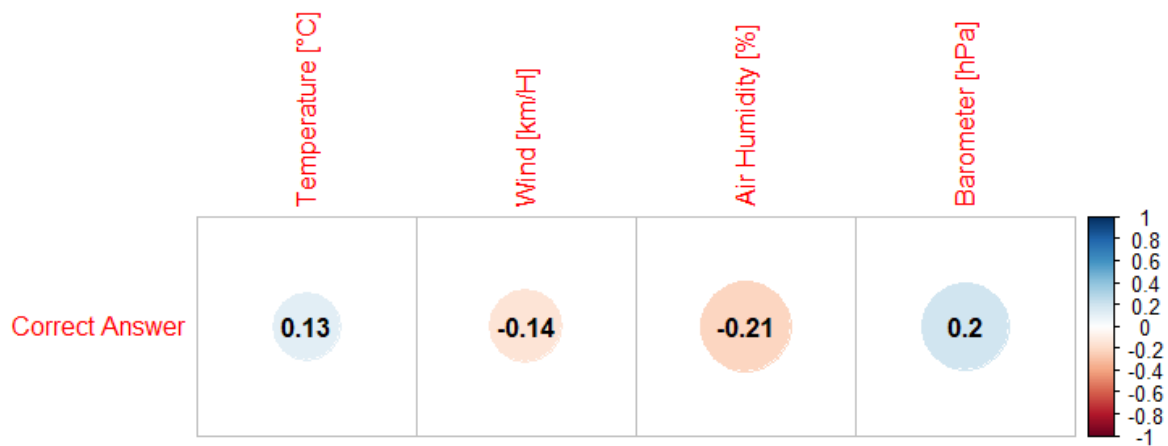

**Supplemental Material S5:** corr plotTM: influence of environmental factors and their significance.

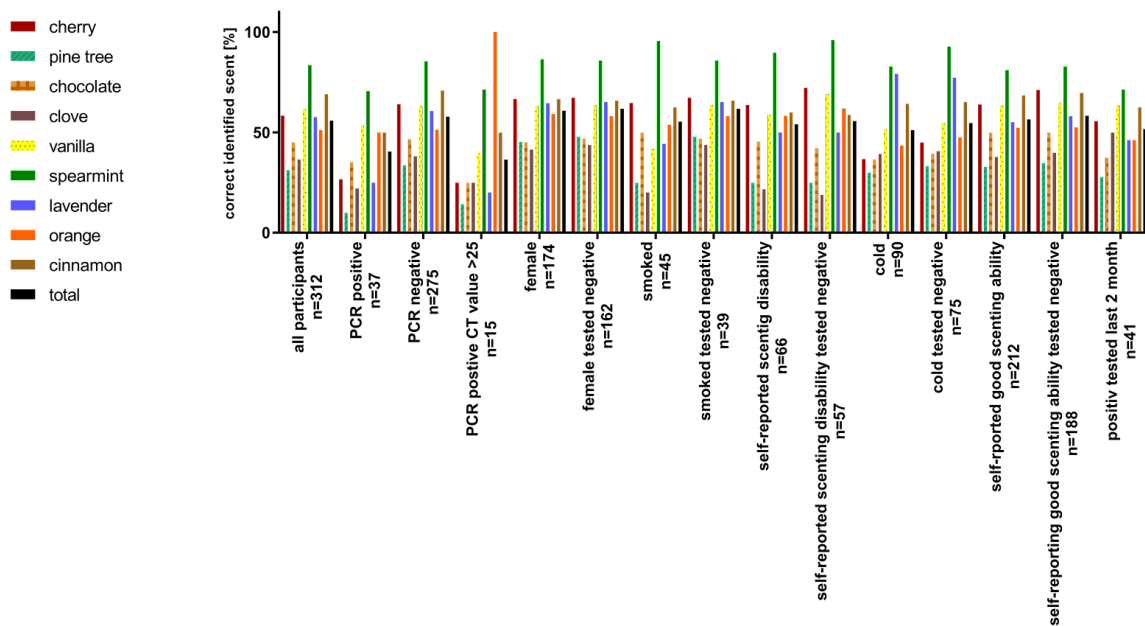

**Supplemental Material S6:** overview of all subgroups and their percentage of correctly identified scents.
